# Supplementary material
Source: MDPI journal article supplement (https://www.mdpi.com/2071-1050/15/3/2382)
Supplement: s1 [file s1]

Archive with 2 entries (2 files):
- Questionnaire English.pdf
- Questionnaire Spanish (Original).pdf
