# Supplementary material
Source: MDPI journal article supplement (https://www.mdpi.com/2071-1050/15/3/2382)
Supplement: s1 [file s1 › Questionnaire English.pdf]

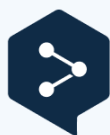

### Questions

Sex: Male ( ) Female ( )

Age: \_\_\_\_\_ years old.

Country of residence:

Peru ( ) Chile ( ) Paraguay ( ) Mexico ( )

Colombia ( ) Bolivia ( ) Panama ( ) Ecuador ( )

Costa Rica ( ) El Salvador ( ) Honduras ( ) Guatemala ( )

Others ( )

You have any of the following conditions and/or diseases (you may check more than one):

Obesity ( ) Diabetes mellitus ( ) Heart disease ( )

Please respond below according to your perception of the pandemic in recent months:

| <b>I have had the perception that...</b>       | <b>Strongly disagree</b> | <b>Disagree</b> | <b>Indifferent</b> | <b>Agreed</b> | <b>Very much in agreement</b> |
|------------------------------------------------|--------------------------|-----------------|--------------------|---------------|-------------------------------|
| I have been less physically active than before |                          |                 |                    |               |                               |
| I have gained weight during these months       |                          |                 |                    |               |                               |
| I have consumed larger amounts of food         |                          |                 |                    |               |                               |
| I have consumed more unhealthy food            |                          |                 |                    |               |                               |

| <b>In the last week, how often have you...</b>                                  | <b>Never/Not applicable</b> | <b>Some or part of the time</b> | <b>Quite a lot, or for a good part of the time.</b> | <b>Much, or most of the time</b> |
|---------------------------------------------------------------------------------|-----------------------------|---------------------------------|-----------------------------------------------------|----------------------------------|
| I had a hard time relaxing                                                      |                             |                                 |                                                     |                                  |
| I realized that my mouth was dry                                                |                             |                                 |                                                     |                                  |
| I could not feel any positive feelings                                          |                             |                                 |                                                     |                                  |
| It became difficult to breathe                                                  |                             |                                 |                                                     |                                  |
| I found it difficult to take the initiative to do things.                       |                             |                                 |                                                     |                                  |
| I overreacted in certain situations                                             |                             |                                 |                                                     |                                  |
| I felt my hands trembling                                                       |                             |                                 |                                                     |                                  |
| I felt I had a lot of nerves                                                    |                             |                                 |                                                     |                                  |
| I was worried about situations in which I might panic or make a fool of myself. |                             |                                 |                                                     |                                  |
| I felt I had nothing to live for                                                |                             |                                 |                                                     |                                  |
| I noticed that I was shaking                                                    |                             |                                 |                                                     |                                  |
| I found it difficult to relax                                                   |                             |                                 |                                                     |                                  |
| I felt sad and depressed                                                        |                             |                                 |                                                     |                                  |

|                                                                                      |  |  |  |  |
|--------------------------------------------------------------------------------------|--|--|--|--|
| I did not tolerate anything that did not allow me to continue with what I was doing. |  |  |  |  |
| I felt I was at the point of panic                                                   |  |  |  |  |
| I couldn't get excited about anything                                                |  |  |  |  |
| I felt I was worth very little as a person                                           |  |  |  |  |
| I felt that I was very irritable                                                     |  |  |  |  |
| I felt my heart beating even though I had not made any physical effort.              |  |  |  |  |
| I was afraid for no reason                                                           |  |  |  |  |
| I felt that life had no meaning                                                      |  |  |  |  |
