# Supplementary material
Source: MDPI journal article supplement (https://www.mdpi.com/2071-1050/15/3/2382)
Supplement: s1 [file s1 › Questionnaire Spanish (Original).pdf]

## Preguntas

Sexo: Masculino ( ) Femenino ( )

Edad: \_\_\_\_\_ años cumplidos.

País de residencia:

Perú ( )

Chile ( )

Paraguay ( )

México ( )

Colombia ( )

Bolivia ( )

Panamá ( )

Ecuador ( )

Costa Rica ( )

El Salvador ( )

Honduras ( )

Guatemala ( )

Otros ( )

Presenta alguna de las siguientes condiciones y/o enfermedades (puede marcar más de una):

Obesidad ( )

Diabetes mellitus ( )

Enfermedad cardíaca ( )

Por favor responda a continuación según la percepción que tuvo en estos meses de la pandemia:

| He tenido la percepción de que...             | Muy en desacuerdo | En desacuerdo | Indiferente | De acuerdo | Muy de acuerdo |
|-----------------------------------------------|-------------------|---------------|-------------|------------|----------------|
| He realizado menos actividad física que antes |                   |               |             |            |                |
| He subido de peso durante estos meses         |                   |               |             |            |                |
| He consumido mayores cantidades de comida     |                   |               |             |            |                |
| He consumido más comida no saludable          |                   |               |             |            |                |

| En la última semana, con qué frecuencia...                                                               | Nunca/No aplicó | Un poco, o durante parte del tiempo | Bastante, o durante una buena parte del tiempo | Mucho, o la mayor parte del tiempo |
|----------------------------------------------------------------------------------------------------------|-----------------|-------------------------------------|------------------------------------------------|------------------------------------|
| Me costó mucho relajarme                                                                                 |                 |                                     |                                                |                                    |
| Me di cuenta que tenía la boca seca                                                                      |                 |                                     |                                                |                                    |
| No podía sentir ningún sentimiento positivo                                                              |                 |                                     |                                                |                                    |
| Se me hizo difícil respirar                                                                              |                 |                                     |                                                |                                    |
| Se me hizo difícil tomar la iniciativa para hacer cosas                                                  |                 |                                     |                                                |                                    |
| Reaccioné exageradamente en ciertas situaciones                                                          |                 |                                     |                                                |                                    |
| Sentí que mis manos temblaban                                                                            |                 |                                     |                                                |                                    |
| Sentí que tenía muchos nervios                                                                           |                 |                                     |                                                |                                    |
| Estaba preocupado por situaciones en las cuales podía tener pánico o en las que podría hacer el ridículo |                 |                                     |                                                |                                    |
| Sentí que no tenía nada por que vivir                                                                    |                 |                                     |                                                |                                    |
| Noté que me agitaba                                                                                      |                 |                                     |                                                |                                    |
| Se me hizo difícil relajarme                                                                             |                 |                                     |                                                |                                    |
| Me sentí triste y deprimido                                                                              |                 |                                     |                                                |                                    |

|                                                                                  |  |  |  |  |
|----------------------------------------------------------------------------------|--|--|--|--|
| No toleré nada que no me permitiera continuar con lo que estaba haciendo         |  |  |  |  |
| Sentí que estaba al punto de pánico                                              |  |  |  |  |
| No me pude entusiasmar por nada                                                  |  |  |  |  |
| Sentí que valía muy poco como persona                                            |  |  |  |  |
| Sentí que estaba muy irritable                                                   |  |  |  |  |
| Sentí los latidos de mi corazón a pesar de no haber hecho ningún esfuerzo físico |  |  |  |  |
| Tuve miedo sin razón                                                             |  |  |  |  |
| Sentí que la vida no tenía ningún sentido                                        |  |  |  |  |
